# Supplementary material for: Reducción del "sindrome de infertilidad estival"
Source: Royal Society of Chemistry journal article supplement (doi:10.1039/c8nr08414a), 2005-01-01
Supplement: c8nr08414a1.pdf [file c8nr08414a1.pdf]

# Supplementary Materials: In situ structural evolution of single particle model catalysts under ambient pressure reaction conditions

Sara Fernández,<sup>†,‡</sup> Lu Gao,<sup>¶</sup> Jan Philipp Hofmann,<sup>¶</sup> Jérôme Carnis,<sup>†,‡</sup> Stéphane  
Labat,<sup>†</sup> Gilbert A. Chahine,<sup>‡</sup> Arno J.F. van Hoof,<sup>¶</sup> M. W. G. M. (Tiny)  
Verhoeven,<sup>¶</sup> Tobias U. Schüllli,<sup>‡</sup> Emiel J. M. Hensen,<sup>¶</sup> Olivier Thomas,<sup>†</sup> and  
Marie-Ingrid Richard<sup>\*,†,‡</sup>

<sup>†</sup>*Aix Marseille Université, CNRS, Université de Toulon, IM2NP UMR 7334, 13397,  
Marseille*

<sup>‡</sup>*ID01/ESRF, 6 rue Jules Horowitz, BP220, F-38043 Grenoble Cedex, France*

<sup>¶</sup>*Laboratory of Inorganic Materials Chemistry, Department of Chemical Engineering and  
Chemistry, Eindhoven University of Technology, P. O. Box 513, 5600MB Eindhoven, The  
Netherlands.*

E-mail: marie-ingrid.richard@im2np.fr

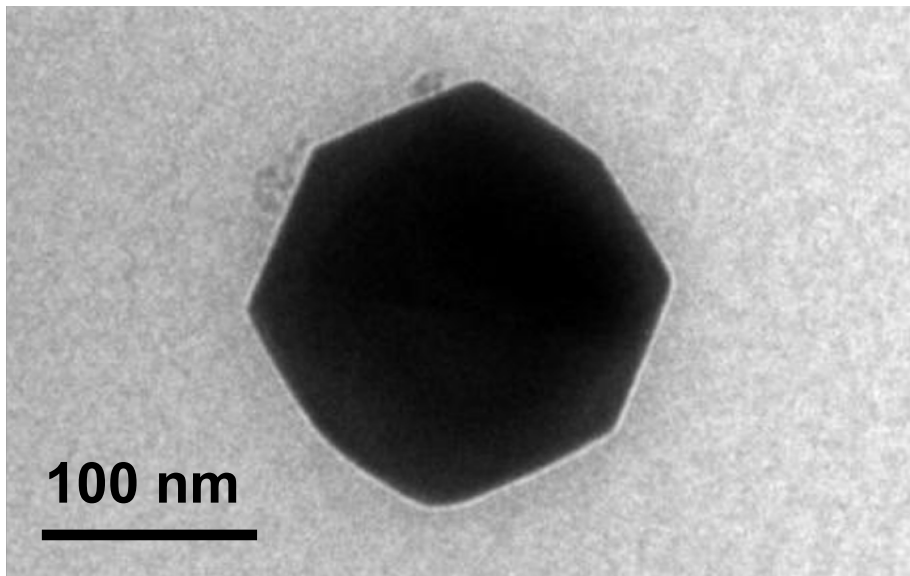

Figure 1: Transmission microscopy image of a THH Pt nanoparticle.

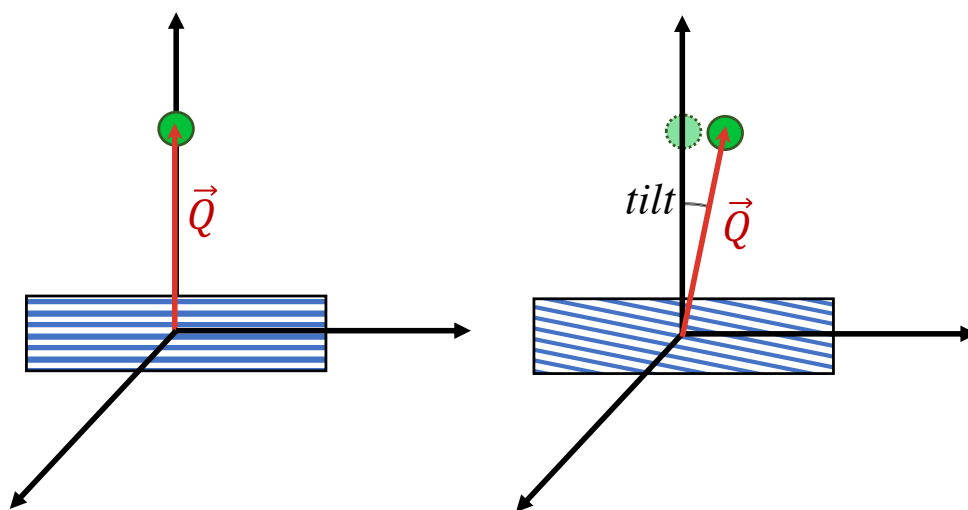

Figure 2: Schematic drawing describing how to determine the crystalline orientation (tilt) of the measured planes.
